# Supplementary material for: Harmful algae blooms: an analysis of recent spatiotemporal trends on California's inland waterbodies
Source: Royal Society of Chemistry journal article supplement (doi:10.1039/d3em00115f), 2023-01-01
Supplement: d3em00115f1.pdf [file d3em00115f1.pdf]

**Supplementary Material Table S1.** Waterbodies with the highest representation ( $\geq 10$ ) in the study data.

|                         | Region 1 | Region 2 | Region 3 | Region 4 | Region 5 | Region 6 | Region 7 | Region 8 | Region 9 |
|-------------------------|----------|----------|----------|----------|----------|----------|----------|----------|----------|
| Klamath River           | 52       |          |          |          |          |          |          |          |          |
| Trinity Lake/River      | 35       |          |          |          |          |          |          |          |          |
| Russian River           | 23       |          |          |          |          |          |          |          |          |
| Pyramid Lake            |          |          |          | 11       |          |          |          |          |          |
| Clear Lake              |          |          |          |          | 113      |          |          |          |          |
| Lake Isabella           |          |          |          |          | 51       |          |          |          |          |
| Discovery Bay           |          |          |          |          | 37       |          |          |          |          |
| Lake/Lagoon Tahoe       |          |          |          |          |          | 18       |          |          |          |
| Silverwood Lake         |          |          |          |          |          | 12       |          |          |          |
| Salton Sea              |          |          |          |          |          |          | 41       |          |          |
| Wister Wildlife Wetland |          |          |          |          |          |          | 10       |          |          |
| Lake Elsinore           |          |          |          |          |          |          |          | 28       |          |
| Big Bear Lake           |          |          |          |          |          |          |          | 23       |          |
| Prado Lake              |          |          |          |          |          |          |          | 13       |          |
| San Diego River         |          |          |          |          |          |          |          |          | 17       |
| Lake Henshaw            |          |          |          |          |          |          |          |          | 15       |
| Others                  | 99       | 32       | 19       | 14       | 397      | 48       | 12       | 58       | 35       |
| TOTAL <sup>a</sup>      | 209      | 76       | 51       | 40       | 598      | 125      | 63       | 122      | 34       |

<sup>a</sup> Grand total, includes waterbodies not listed.

**Supplementary Material Table S2.** Strength of the relationships among four selected variables relating to HAB observations on inland waterbodies in California.

|                         | HABs Sighting | Land Area (LA) | River/Stream (RS) | Lake/Pond/Reservoir (LPR) | Population <sup>a</sup> |
|-------------------------|---------------|----------------|-------------------|---------------------------|-------------------------|
| HABs Sighting           | -             | 5.59E-03       | 3.46E-03          | 1.36E-03                  | <b>0.476</b>            |
| Land Area               | 0.901         | -              | 2.01E-05          | 4.12E-05                  | <b>0.206</b>            |
| River/Stream            | 0.919         | 0.990          | -                 | 1.99E-04                  | <b>0.211</b>            |
| Lake/Reservoir          | 0.944         | 0.986          | 0.974             | -                         | <b>0.303</b>            |
| Population <sup>a</sup> | <b>-0.326</b> | <b>-0.545</b>  | <b>-0.540</b>     | <b>-0.457</b>             | -                       |

Below diagonal: Linear  $r$  (Pearson); above diagonal:  $p$ (uncorrelated).

<sup>a</sup> Population density uncorrelated with high probability ( $p$ (uncorrelated)  $> 0.05$ ).

**Supplementary Material Table S3.** Strength of the relationships among California's nine water quality regions based on 2016-2020 on HAB observations on inland waterbodies.

|                       | Region 1            | Region 2            | Region 3 <sup>a</sup> | Region 4            | Region 5            | Region 6            | Region 7 <sup>a</sup> | Region 8     | Region 9     |
|-----------------------|---------------------|---------------------|-----------------------|---------------------|---------------------|---------------------|-----------------------|--------------|--------------|
| Region 1              | -                   | 0.006               | <b>0.165</b>          | 0.034               | 0.027               | 0.028               | <b>0.224</b>          | 0.012        | 0.037        |
| Region 2              | -0.994 <sup>b</sup> | -                   | <b>0.227</b>          | 0.012               | 0.009               | 0.010               | <b>0.160</b>          | 0.001        | 0.014        |
| Region 3 <sup>a</sup> | <b>0.835</b>        | <b>-0.773</b>       | -                     | <b>0.325</b>        | <b>0.291</b>        | <b>0.318</b>        | <b>0.683</b>          | <b>0.254</b> | <b>0.344</b> |
| Region 4              | -0.966 <sup>b</sup> | 0.988               | -0.675                | -                   | 0.002               | 0.009               | <b>0.088</b>          | 0.006        | 0.004        |
| Region 5              | 0.973               | -0.991 <sup>b</sup> | 0.709                 | -0.998 <sup>b</sup> | -                   | 0.014               | <b>0.106</b>          | 0.004        | 0.009        |
| Region 6              | 0.972               | -0.990 <sup>b</sup> | 0.682                 | -0.991 <sup>b</sup> | 0.986               | -                   | <b>0.110</b>          | 0.008        | 0.002        |
| Region 7 <sup>a</sup> | <b>0.776</b>        | <b>-0.840</b>       | <b>0.317</b>          | <b>-0.912</b>       | <b>0.894</b>        | <b>0.890</b>        | -                     | <b>0.136</b> | <b>0.087</b> |
| Region 8              | -0.988 <sup>b</sup> | 0.999               | -0.746 <sup>b</sup>   | 0.994               | -0.996 <sup>b</sup> | -0.992 <sup>b</sup> | -0.864 <sup>b</sup>   | -            | 0.009        |
| Region 9              | -0.963 <sup>b</sup> | 0.986               | -0.656 <sup>b</sup>   | 0.996               | -0.991 <sup>b</sup> | -0.998 <sup>b</sup> | -0.913 <sup>b</sup>   | 0.991        | -            |

Below diagonal: Linear  $r$  (Pearson); above diagonal:  $p$ (uncorrelated).

<sup>a</sup> Uncorrelated with high probability ( $p$ (uncorrelated)  $> 0.05$ ).

<sup>b</sup> Negative bivariate correlation with high probability ( $p$ (uncorrelated)  $< 0.05$ ).
